# Supplementary material
Source: publisher site journal article supplement (https://www.dovepress.com/get_supplementary_file.php?f=358730.xlsx)
Supplement: Supplementary file 1 [file get_supplementary_file.php]

## Sheet: Sheet1
Table S2 PCR and antimicrobial susceptibility profiles of the 26 strains with sil operon and/or silver resistance
Isolate	Species	MLST for K. pneumoniae	MIC for silver nitrate (μg/ml)	PCR result										Amtimicrobial susceptibility profiles											BioProject No
				Sil E	Sil RS	silR	Sil CBA	Sil F	Sil B	Sil A	Sil P	SilS		Ceftriaxone	Ceftazidime	Cefepime	Aztreonam	Imipenem	Meropenem	Amikacin	Gentamicin	Levofloxacin	Ciprofloxacin	Trimethoprim/ sulfamethoxazole
WHC1	K. pneumoniae	ST967	＞512	-	-	-	-	-	-	-	-	-		R	R	R	R	R	R	S	R	R	R	R	PRJNA754800
WHC2	K. pneumoniae	ST967	＞512	-	-	-	-	-	-	-	-	-		R	R	R	R	R	R	S	R	R	R	R	PRJNA754801
WHC9	K. pneumoniae	ST15	32	-	-	+	+	+	+	+	+	+		R	R	I	R	S	S	S	R	R	R	R	PRJNA754802
WHC10	E. hormaechei	/	＞512	+	+	+	+	+	+	+	+	+		R	R	R	R	R	R	S	R	S	S	R	PRJNA754803
WHC12	K. pneumoniae	ST15	32	-	-	+	+	+	+	+	+	+		R	R	R	R	S	S	S	R	R	R	R	PRJNA754804
WHC16	K. pneumoniae	ST15	32	-	-	+	+	+	+	+	+	+		R	R	R	R	S	S	S	R	R	R	R	PRJNA754806
WHC21	K. pneumoniae	ST35	32	-	-	+	+	+	+	+	+	+		S	S	S	S	S	S	S	S	S	S	S	PRJNA754809
WHC31	K. pneumoniae	ST45	16	+	+	+	+	+	+	+	+	+		R	I	R	I	S	S	S	S	S	I	R	PRJNA754810
WHC41	K. quasipneumoniae	/	32	-	-	+	+	+	+	+	+	+		R	R	S	S	S	S	S	S	S	S	R	PRJNA754811
WHC49	K. pneumoniae	ST39	16	-	+	+	+	+	+	+	+	+		S	S	S	S	S	S	S	S	S	S	S	PRJNA754812
WHC57	K. pneumoniae	ST15	16	-	-	+	+	+	+	+	+	+		R	R	R	R	S	S	S	R	R	R	R	PRJNA754813
WHC61	E. roggenkampii	/	16	+	+	+	+	+	+	+	+	+		R	I	S	I	S	S	S	S	S	S	S	PRJNA754814
WHC65	C. freundii	/	8	+	+	+	+	+	+	+	+	+		R	R	S	R	S	S	S	S	S	S	S	PRJNA754815
WHC135	E. hormaechei	/	＞512	+	-	+	+	+	+	+	+	+		R	R	R	R	R	R	S	R	R	R	R	PRJNA754817
WHC151	K. pneumoniae	ST11	32	-	-	+	+	+	+	+	+	+		R	R	R	R	R	R	R	R	R	R	R	PRJNA754819
WHC152	E. coli	/	16	+	+	+	+	+	+	+	+	+		R	I	I	R	S	S	S	R	I	R	R	PRJNA754820
WHC154	E. hormaechei	/	＞512	+	+	+	+	+	+	+	+	+		R	R	R	R	R	R	S	R	R	R	R	PRJNA754821
WHC160	K. pneumoniae	ST3393	32	+	+	+	+	+	+	+	+	+		R	R	S	R	S	S	S	R	I	R	R	PRJNA754822
WHC161	K. pneumoniae	ST65	32	-	-	+	+	+	+	+	+	+		S	S	S	S	S	S	S	S	I	R	S	PRJNA754824
WHC167	E. cloaca	/	32	-	-	+	-	+	+	+	+	+		S	S	S	S	S	S	S	S	S	S	S	PRJNA754825
WHC171	E. hormaechei	/	32	+	-	+	+	+	+	+	+	+		R	R	S	R	S	S	S	S	S	S	S	PRJNA754826
WHC179	K. variicola	/	32	-	-	+	+	+	+	+	+	+		R	R	S	R	S	S	S	R	R	R	R	PRJNA754827
WHC181	E. hormaechei	/	32	+	+	+	+	+	+	+	+	-		S	S	S	S	S	S	S	S	S	S	R	PRJNA754828
WHC182	E. hormaechei	/	64	-	-	+	+	+	+	+	+	+		S	S	S	S	S	S	S	S	S	S	S	PRJNA754829
WHC190	E. hormaechei	/	＞512	+	-	+	+	+	+	+	+	+		R	R	R	R	S	S	S	R	S	R	R	PRJNA754830
WHC192	K. pneumoniae	ST412	32	-	+	+	+	+	+	+	+	+		R	S	S	S	S	S	S	S	S	S	S	PRJNA754831
